# Supplementary material for: Identification of a pyroptosis-related lncRNA risk model for predicting prognosis and immune response in colon adenocarcinoma
Source: World J Surg Oncol. 2022 Apr 12;20:118. doi: 10.1186/s12957-022-02572-8 (PMC9004096; doi:10.1186/s12957-022-02572-8)
Supplement: Supplementary file 1 — Additional file 1: Table S1. 155 pyroptosis-related genes acquired from the GeneCard. [file 12957_2022_2572_MOESM1_ESM.xlsx]

## Sheet: Sheet1
Gene Symbol	Description	Category
GSDMD	Gasdermin D	Protein Coding
GSDME	Gasdermin E	Protein Coding
NLRP3	NLR Family Pyrin Domain Containing 3	Protein Coding
CASP1	Caspase 1	Protein Coding
GSDMB	Gasdermin B	Protein Coding
CASP4	Caspase 4	Protein Coding
GSDMC	Gasdermin C	Protein Coding
NLRP1	NLR Family Pyrin Domain Containing 1	Protein Coding
GSDMA	Gasdermin A	Protein Coding
CARD8	Caspase Recruitment Domain Family Member 8	Protein Coding
GZMB	Granzyme B	Protein Coding
IL1B	Interleukin 1 Beta	Protein Coding
GZMA	Granzyme A	Protein Coding
DPP9	Dipeptidyl Peptidase 9	Protein Coding
DPP8	Dipeptidyl Peptidase 8	Protein Coding
NLRC4	NLR Family CARD Domain Containing 4	Protein Coding
CASP8	Caspase 8	Protein Coding
CASP5	Caspase 5	Protein Coding
AIM2	Absent In Melanoma 2	Protein Coding
ZBP1	Z-DNA Binding Protein 1	Protein Coding
PYCARD	PYD And CARD Domain Containing	Protein Coding
NAIP	NLR Family Apoptosis Inhibitory Protein	Protein Coding
DHX9	DExH-Box Helicase 9	Protein Coding
NLRP9	NLR Family Pyrin Domain Containing 9	Protein Coding
CASP3	Caspase 3	Protein Coding
IL18	Interleukin 18	Protein Coding
HMGB1	High Mobility Group Box 1	Protein Coding
APIP	APAF1 Interacting Protein	Protein Coding
TREM2	Triggering Receptor Expressed On Myeloid Cells 2	Protein Coding
FOXO3	Forkhead Box O3	Protein Coding
CASP6	Caspase 6	Protein Coding
TXNIP	Thioredoxin Interacting Protein	Protein Coding
DDX3X	DEAD-Box Helicase 3 X-Linked	Protein Coding
GBP1	Guanylate Binding Protein 1	Protein Coding
GJA1	Gap Junction Protein Alpha 1	Protein Coding
PRDM1	PR/SET Domain 1	Protein Coding
UBR2	Ubiquitin Protein Ligase E3 Component N-Recognin 2	Protein Coding
CPTP	Ceramide-1-Phosphate Transfer Protein	Protein Coding
TP53	Tumor Protein P53	Protein Coding
VDR	Vitamin D Receptor	Protein Coding
BRD4	Bromodomain Containing 4	Protein Coding
NEK7	NIMA Related Kinase 7	Protein Coding
CRTAC1	Cartilage Acidic Protein 1	Protein Coding
NFE2L2	Nuclear Factor, Erythroid 2 Like 2	Protein Coding
AGER	Advanced Glycosylation End-Product Specific Receptor	Protein Coding
TET2	Tet Methylcytosine Dioxygenase 2	Protein Coding
UTS2	Urotensin 2	Protein Coding
CTSV	Cathepsin V	Protein Coding
NFKB1	Nuclear Factor Kappa B Subunit 1	Protein Coding
APOE	Apolipoprotein E	Protein Coding
SDHB	Succinate Dehydrogenase Complex Iron Sulfur Subunit B	Protein Coding
EEF2K	Eukaryotic Elongation Factor 2 Kinase	Protein Coding
P2RX7	Purinergic Receptor P2X 7	Protein Coding
CD274	CD274 Molecule	Protein Coding
FGF21	Fibroblast Growth Factor 21	Protein Coding
BSG	Basigin (Ok Blood Group)	Protein Coding
CEBPB	CCAAT Enhancer Binding Protein Beta	Protein Coding
TFAM	Transcription Factor A, Mitochondrial	Protein Coding
IL32	Interleukin 32	Protein Coding
MALT1	MALT1 Paracaspase	Protein Coding
STK4	Serine/Threonine Kinase 4	Protein Coding
MST1	Macrophage Stimulating 1	Protein Coding
PRF1	Perforin 1	Protein Coding
ELAVL1	ELAV Like RNA Binding Protein 1	Protein Coding
HDAC6	Histone Deacetylase 6	Protein Coding
SQSTM1	Sequestosome 1	Protein Coding
IRF3	Interferon Regulatory Factor 3	Protein Coding
ZDHHC1	Zinc Finger DHHC-Type Containing 1	Protein Coding
STING1	Stimulator Of Interferon Response CGAMP Interactor 1	Protein Coding
PTEN	Phosphatase And Tensin Homolog	Protein Coding
ADORA1	Adenosine A1 Receptor	Protein Coding
ADORA2B	Adenosine A2b Receptor	Protein Coding
ADORA2A	Adenosine A2a Receptor	Protein Coding
ADORA3	Adenosine A3 Receptor	Protein Coding
METTL3	Methyltransferase 3, N6-Adenosine-Methyltransferase Complex Catalytic Subunit	Protein Coding
PECAM1	Platelet And Endothelial Cell Adhesion Molecule 1	Protein Coding
TRIM31	Tripartite Motif Containing 31	Protein Coding
CAMP	Cathelicidin Antimicrobial Peptide	Protein Coding
MRE11	MRE11 Homolog, Double Strand Break Repair Nuclease	Protein Coding
PARP1	Poly(ADP-Ribose) Polymerase 1	Protein Coding
GBP5	Guanylate Binding Protein 5	Protein Coding
NR1H2	Nuclear Receptor Subfamily 1 Group H Member 2	Protein Coding
CTSG	Cathepsin G	Protein Coding
MKI67	Marker Of Proliferation Ki-67	Protein Coding
IL36G	Interleukin 36 Gamma	Protein Coding
IL36B	Interleukin 36 Beta	Protein Coding
PRTN3	Proteinase 3	Protein Coding
SERPINB1	Serpin Family B Member 1	Protein Coding
NLRP6	NLR Family Pyrin Domain Containing 6	Protein Coding
APOL1	Apolipoprotein L1	Protein Coding
FOXP3	Forkhead Box P3	Protein Coding
NLRP7	NLR Family Pyrin Domain Containing 7	Protein Coding
BNIP3	BCL2 Interacting Protein 3	Protein Coding
ANO6	Anoctamin 6	Protein Coding
FADD	Fas Associated Via Death Domain	Protein Coding
SESN2	Sestrin 2	Protein Coding
TNF	Tumor Necrosis Factor	Protein Coding
VIM	Vimentin	Protein Coding
CAPN1	Calpain 1	Protein Coding
JUN	Jun Proto-Oncogene, AP-1 Transcription Factor Subunit	Protein Coding
MEFV	MEFV Innate Immuity Regulator, Pyrin	Protein Coding
ALK	ALK Receptor Tyrosine Kinase	Protein Coding
SIRT1	Sirtuin 1	Protein Coding
BIRC3	Baculoviral IAP Repeat Containing 3	Protein Coding
BIRC2	Baculoviral IAP Repeat Containing 2	Protein Coding
UBE2D2	Ubiquitin Conjugating Enzyme E2 D2	Protein Coding
RIPK3	Receptor Interacting Serine/Threonine Kinase 3	Protein Coding
LY96	Lymphocyte Antigen 96	Protein Coding
GLMN	Glomulin, FKBP Associated Protein	Protein Coding
IRGM	Immunity Related GTPase M	Protein Coding
SCAF11	SR-Related CTD Associated Factor 11	Protein Coding
NLRP13	NLR Family Pyrin Domain Containing 13	Protein Coding
TUBB6	Tubulin Beta 6 Class V	Protein Coding
MYD88	MYD88 Innate Immune Signal Transduction Adaptor	Protein Coding
TLR8	Toll Like Receptor 8	Protein Coding
NOS1	Nitric Oxide Synthase 1	Protein Coding
NOS2	Nitric Oxide Synthase 2	Protein Coding
PYDC2	Pyrin Domain Containing 2	Protein Coding
ACE2	Angiotensin Converting Enzyme 2	Protein Coding
AKT1	AKT Serine/Threonine Kinase 1	Protein Coding
EGFR	Epidermal Growth Factor Receptor	Protein Coding
TP63	Tumor Protein P63	Protein Coding
CASP9	Caspase 9	Protein Coding
ATF6	Activating Transcription Factor 6	Protein Coding
IRF1	Interferon Regulatory Factor 1	Protein Coding
IRF2	Interferon Regulatory Factor 2	Protein Coding
IFI16	Interferon Gamma Inducible Protein 16	Protein Coding
ORMDL3	ORMDL Sphingolipid Biosynthesis Regulator 3	Protein Coding
POP1	POP1 Homolog, Ribonuclease P/MRP Subunit	Protein Coding
BTK	Bruton Tyrosine Kinase	Protein Coding
MDM2	MDM2 Proto-Oncogene	Protein Coding
STAT3	Signal Transducer And Activator Of Transcription 3	Protein Coding
TLR2	Toll Like Receptor 2	Protein Coding
BCL2	BCL2 Apoptosis Regulator	Protein Coding
ANXA2	Annexin A2	Protein Coding
IL1RN	Interleukin 1 Receptor Antagonist	Protein Coding
BECN1	Beclin 1	Protein Coding
CD14	CD14 Molecule	Protein Coding
HUWE1	HECT, UBA And WWE Domain Containing E3 Ubiquitin Protein Ligase 1	Protein Coding
TNFSF13B	TNF Superfamily Member 13b	Protein Coding
TLR9	Toll Like Receptor 9	Protein Coding
CHI3L1	Chitinase 3 Like 1	Protein Coding
GSTO1	Glutathione S-Transferase Omega 1	Protein Coding
IL13	Interleukin 13	Protein Coding
ASIC1	Acid Sensing Ion Channel Subunit 1	Protein Coding
PANX1	Pannexin 1	Protein Coding
LRPPRC	Leucine Rich Pentatricopeptide Repeat Containing	Protein Coding
CXCL8	C-X-C Motif Chemokine Ligand 8	Protein Coding
IL13RA2	Interleukin 13 Receptor Subunit Alpha 2	Protein Coding
BST2	Bone Marrow Stromal Cell Antigen 2	Protein Coding
GPER1	G Protein-Coupled Estrogen Receptor 1	Protein Coding
LYST	Lysosomal Trafficking Regulator	Protein Coding
NCR1	Natural Cytotoxicity Triggering Receptor 1	Protein Coding
CLEC5A	C-Type Lectin Domain Containing 5A	Protein Coding
CGAS	Cyclic GMP-AMP Synthase	Protein Coding
