# Supplementary material for: Identification of a pyroptosis-related lncRNA risk model for predicting prognosis and immune response in colon adenocarcinoma
Source: World J Surg Oncol. 2022 Apr 12;20:118. doi: 10.1186/s12957-022-02572-8 (PMC9004096; doi:10.1186/s12957-022-02572-8)
Supplement: Supplementary file 2 — Additional file 2: Table S2. 5 mRNAs, 7 miRNAs and 132 lncRNAs in the PRlncRNA ceRNA network. [file 12957_2022_2572_MOESM2_ESM.xlsx]

## Sheet: Sheet1
gene	type
CEBPB	mRNA
IL1B	mRNA
SESN2	mRNA
ALK	mRNA
TXNIP	mRNA
hsa-mir-155	miRNA
hsa-mir-21	miRNA
hsa-mir-182	miRNA
hsa-mir-96	miRNA
hsa-mir-152	miRNA
hsa-mir-17	miRNA
hsa-mir-106a	miRNA
FAM182A	lncRNA
LINC00525	lncRNA
DIRC1	lncRNA
SNHG11	lncRNA
C15orf56	lncRNA
C5orf64	lncRNA
WDFY3-AS2	lncRNA
WT1-AS	lncRNA
CLLU1	lncRNA
LY86-AS1	lncRNA
LINC00365	lncRNA
RUSC1-AS1	lncRNA
PCA3	lncRNA
STEAP2-AS1	lncRNA
CDC42-IT1	lncRNA
LINC00278	lncRNA
DIRC3	lncRNA
DLX6-AS1	lncRNA
OSBPL10-AS1	lncRNA
LINC00472	lncRNA
ENOX1-AS1	lncRNA
MAGI2-AS3	lncRNA
PCCA-AS1	lncRNA
GAS5	lncRNA
LINC00402	lncRNA
HLCS-IT1	lncRNA
PLCH1-AS1	lncRNA
ADAMTS9-AS1	lncRNA
ADAMTS9-AS2	lncRNA
FOXP1-IT1	lncRNA
ARHGEF26-AS1	lncRNA
LIFR-AS1	lncRNA
CRNDE	lncRNA
ATG10-AS1	lncRNA
MALAT1	lncRNA
KCNQ1OT1	lncRNA
PRSS30P	lncRNA
C9orf163	lncRNA
C1orf195	lncRNA
LINC00488	lncRNA
SMCR5	lncRNA
ASH1L-IT1	lncRNA
HOTAIR	lncRNA
TTC3-AS1	lncRNA
LINC00452	lncRNA
FTX	lncRNA
DLEU2	lncRNA
ITCH-IT1	lncRNA
HS1BP3-IT1	lncRNA
CYP1B1-AS1	lncRNA
JAZF1-AS1	lncRNA
EGOT	lncRNA
BRWD1-IT1	lncRNA
ZBTB20-AS3	lncRNA
ITGB5-AS1	lncRNA
PVT1	lncRNA
SNHG1	lncRNA
TMEM75	lncRNA
PWRN1	lncRNA
C15orf54	lncRNA
C6orf223	lncRNA
TP53TG1	lncRNA
LINC00173	lncRNA
UCA1	lncRNA
ST7-OT4	lncRNA
LINC00114	lncRNA
SFTA1P	lncRNA
UBE2Q1-AS1	lncRNA
LINC00400	lncRNA
DSCR9	lncRNA
FARP1-AS1	lncRNA
TBL1XR1-AS1	lncRNA
LARS2-AS1	lncRNA
SNHG7	lncRNA
ZFY-AS1	lncRNA
GAS6-AS1	lncRNA
LATS2-AS1	lncRNA
RBMS3-AS3	lncRNA
MYB-AS1	lncRNA
ZNF630-AS1	lncRNA
SNHG3	lncRNA
ARAP1-AS2	lncRNA
LNX1-AS1	lncRNA
PCAT1	lncRNA
NKX2-1-AS1	lncRNA
FRMD6-AS2	lncRNA
SHANK2-AS3	lncRNA
LINC00311	lncRNA
C10orf55	lncRNA
ATP11A-AS1	lncRNA
LINC00461	lncRNA
H19	lncRNA
CCDC13-AS1	lncRNA
LINC00324	lncRNA
SNHG12	lncRNA
DSCR8	lncRNA
COL18A1-AS2	lncRNA
COL4A2-AS2	lncRNA
SOX21-AS1	lncRNA
KIF25-AS1	lncRNA
MIR205HG	lncRNA
LINC00484	lncRNA
XIAP-AS1	lncRNA
ZBTB20-AS1	lncRNA
LINC00491	lncRNA
CACNA1C-IT3	lncRNA
IGF2-AS	lncRNA
TTTY14	lncRNA
TMEM78	lncRNA
C17orf77	lncRNA
TMEM105	lncRNA
LINC00449	lncRNA
LINC00184	lncRNA
SHANK2-AS1	lncRNA
LMO7-AS1	lncRNA
ALMS1-IT1	lncRNA
STARD13-IT1	lncRNA
ZRANB2-AS1	lncRNA
LINC00330	lncRNA
EPN2-AS1	lncRNA
ANKRD44-IT1	lncRNA
VCAN-AS1	lncRNA
RSF1-IT1	lncRNA
DENND5B-AS1	lncRNA
ITPK1-AS1	lncRNA
LINC00471	lncRNA
LINC00393	lncRNA
NAALADL2-AS1	lncRNA
KDM5C-IT1	lncRNA
KLF7-IT1	lncRNA
OXCT1-AS1	lncRNA
LINC00507	lncRNA
